# Supplementary material
Source: MDPI journal article supplement (https://www.mdpi.com/1424-8247/15/7/783)

## Supplementary information S1.

### Search constructs:

- ("COVID-19"[Mesh] OR "SARS-CoV-2"[Mesh]) AND "Receptors, Interleukin-6/antagonists and inhibitors"[Mesh]
- ("COVID-19"[Mesh] OR "SARS-CoV-2"[Mesh]) AND "tocilizumab" [Supplementary Concept]
- ("COVID-19"[Mesh] OR "SARS-CoV-2"[Mesh]) AND "siltuximab" [Supplementary Concept]
- ("COVID-19"[Mesh] OR "SARS-CoV-2"[Mesh]) AND "sarilumab" [Supplementary Concept]
- ("COVID-19"[Mesh] OR "SARS-CoV-2"[Mesh]) AND "Receptors, Interleukin-1/antagonists and inhibitors"[Mesh]
- ("COVID-19"[Mesh] OR "SARS-CoV-2"[Mesh]) AND "anakinra" [Supplementary Concept]
- ("COVID-19"[Mesh] OR "SARS-CoV-2"[Mesh]) AND "canakinumab" [Supplementary Concept]
- ("COVID-19"[Mesh] OR "SARS-CoV-2"[Mesh]) AND ( "Interferons"[Mesh] OR "Interferon Type I"[Mesh] OR "interferon type III" [Supplementary Concept] )
- ("COVID-19"[Mesh] OR "SARS-CoV-2"[Mesh]) AND ( "Mesenchymal Stem Cell Transplantation"[Mesh] OR "Mesenchymal Stem Cells"[Mesh] )
- ("COVID-19"[Mesh] OR "SARS-CoV-2"[Mesh]) AND ( "anti-spike antibody"[Mesh] OR "Bamlanivimab"[Mesh] OR "Bamlanivimab plus Etesevimab"[Mesh] OR "Casirivimab/ imdevimab"[Mesh] OR "Bamlanivimab or Casirivimab/imdevimab"[Mesh] OR "Sotrovimab" [Mesh])

(((((pneumonia SARS-coV-2 infection) OR (pneumonic SARS-coV-2 infection)) OR (pneumonic sars-cov 2)) OR (pneumonic)) OR (sars cov-2)) OR (COVID-19)) AND (((((((((((Mesenchymal Stem Cells) OR (Mesenchymal Stem Cell Transplantation)) OR (Interferon Type I)) OR (Interferons)) OR (canakinumab)) OR (anakinra)) OR (Receptors, Interleukin-1/antagonists and inhibitors)) OR (sarilumab)) OR (siltuximab)) OR (tocilizumab)) OR (Receptors, Interleukin-6/antagonists and inhibitors) OR (anti-spike antibody) OR (Bamlanivimab) OR (Bamlanivimab plus Etesevimab) OR (Casirivimab/ imdevimab) OR (sotrovimab))(AND ((length stay covid) OR (mortality)))

Register your review now

Edit your details

You have 1 records

## Records that are being assessed

*These records have been submitted for publication and are being assessed by the editorial team. You cannot make changes to these records while they are going through the editorial process.*

| ID     | Title                                                           | Status             | Last edited                                                                                    |
|--------|-----------------------------------------------------------------|--------------------|------------------------------------------------------------------------------------------------|
| 317998 | Biologics in treatment of Covid-19 infection: systematic review | Not yet registered | 16/03/2022  |

Figure S1. Meta-analysis of the studies that determined mortality with Tocilizumab vs standard therapy

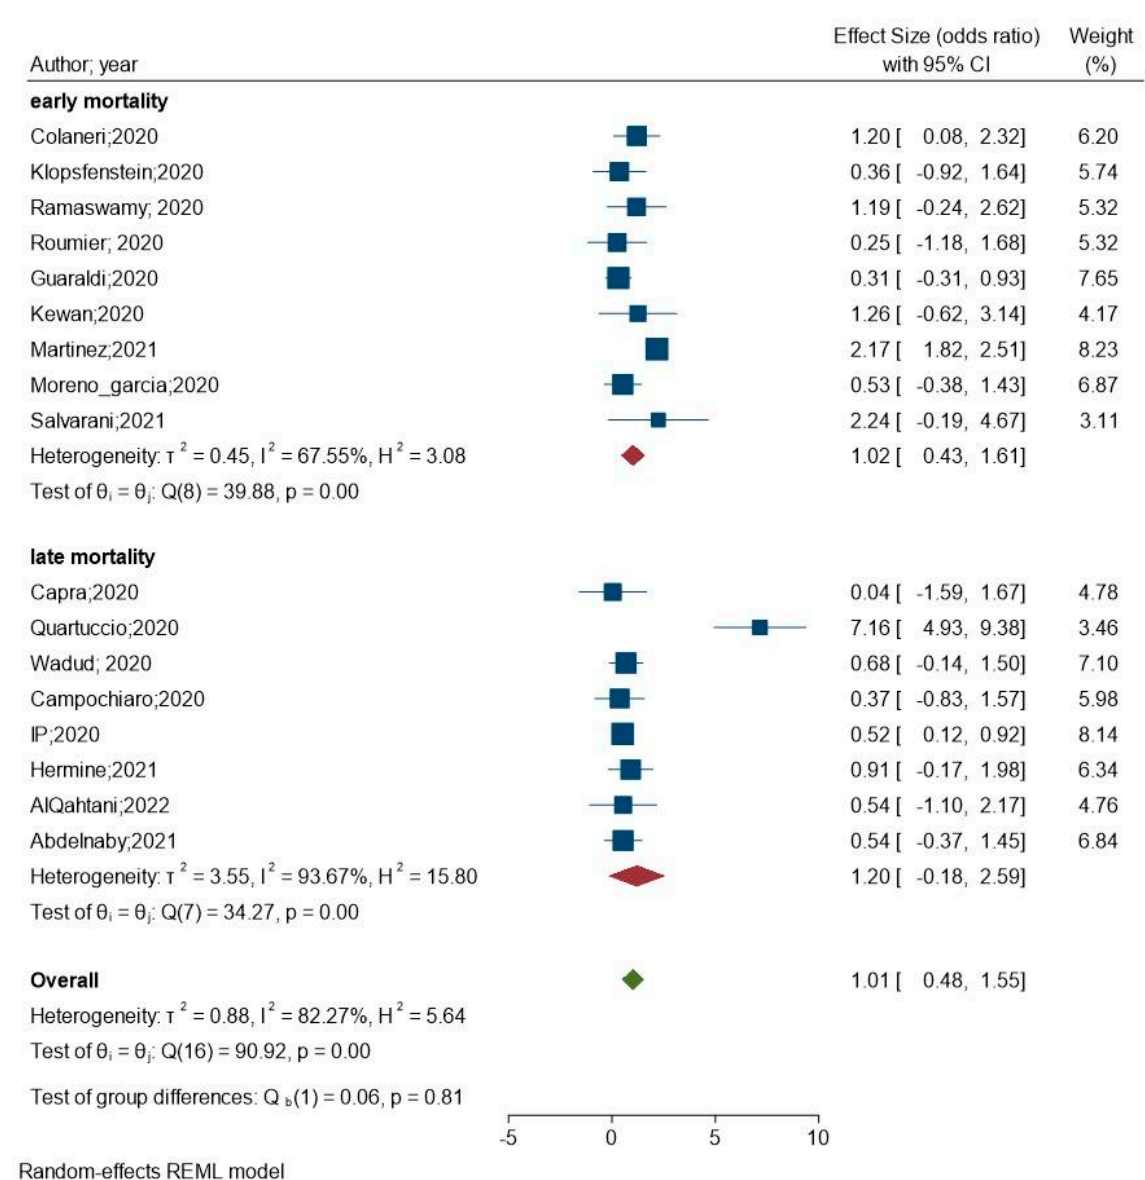

Supplement: s1 [file s1]
